# Supplementary material
Source: Springer Nature journal article supplement (https://www.springermedizin.de/resource/supplementary/12943_2009_645_MOESM12_ESM.pdf/9554474)

**A****A549**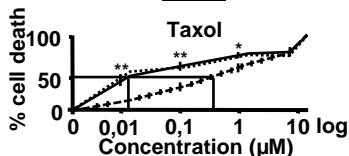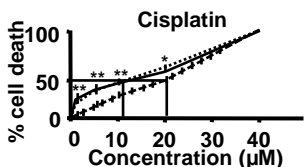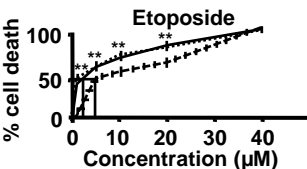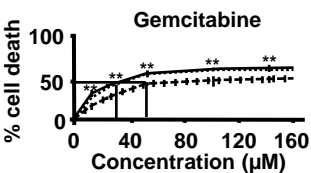**B****H1299**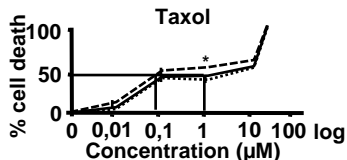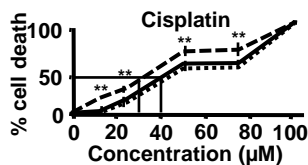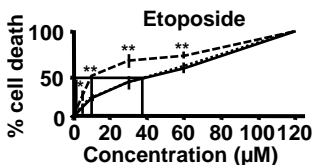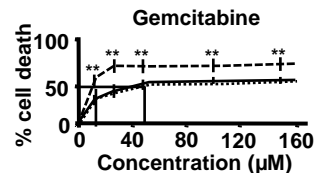

— cont ++ A549 TGFB1 si -- H1299 TGFB1 ve ... empty vector

**C** A549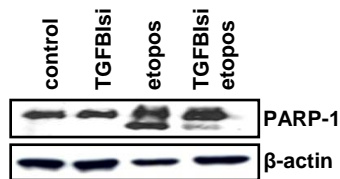**D** H1299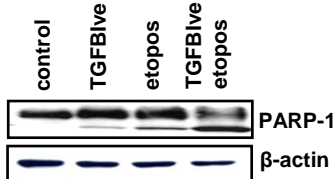

Supplement: MOESM12 [file 9554474]
